# Supplementary material for: Low-Modulus PMMA Has the Potential to Reduce Stresses on Endplates after Cement Discoplasty
Source: MDPI journal article supplement (doi:10.3390/jfb13010018), 2022-02-04
Supplement: s1 [file s1]

# S1: Supplementary information

## Mesh convergence

Data regarding mesh convergence for the lumbar spine discoplasty models are available below in Table S1 and Table S2.

**Table S1.** Comparison of absolute percent difference in ROM in different directions for the different meshes. The three first lines present the healthy models, and the three below the PMMA discoplasty models.

|                                                        | Flexion | Extension | Bending left | Bending right | Rotation left | Rotation right |
|--------------------------------------------------------|---------|-----------|--------------|---------------|---------------|----------------|
| <b>FE<sub>org</sub> vs. FE<sub>con</sub></b>           | 0.02%   | 1.89%     | 0.21%        | 0.90%         | 0.10%         | 0.09%          |
| <b>FE<sub>con</sub> vs. FE<sub>fine2</sub></b>         | 0.001%  | 1.35%     | 0.09%        | 0.64%         | 0.03%         | 0.004%         |
| <b>FE<sub>fine1</sub> vs. FE<sub>fine2</sub></b>       | 0.004%  | 0.13%     | 0.04%        | 0.07%         | 0.02%         | 0.02%          |
| <b>PMMA: FE<sub>org</sub> vs. FE<sub>con</sub></b>     | 0.09%   | 1.55%     | 0.16%        | 0.19%         | 0.06%         | 0.11%          |
| <b>PMMA: FE<sub>con</sub> vs. FE<sub>fine2</sub></b>   | 1.66%   | 1.42%     | 2.04%        | 1.89%         | 0.42%         | 0.33%          |
| <b>PMMA: FE<sub>fine1</sub> vs. FE<sub>fine2</sub></b> | 0.47%   | 0.43%     | 0.62%        | 0.56%         | 0.10%         | 0.07%          |

**Table S1.** Comparison of absolute percent difference in AEVM in different directions for the different meshes. The three first lines present the healthy models, and the three below the PMMA discoplasty models.

|                                                        | Flexion | Extension | Bending left | Bending right | Rotation left | Rotation right |
|--------------------------------------------------------|---------|-----------|--------------|---------------|---------------|----------------|
| <b>FE<sub>org</sub> vs. FE<sub>con</sub></b>           | 0.46%   | 1.52%     | 0.44%        | 0.93%         | 0.30%         | 0.22%          |
| <b>FE<sub>con</sub> vs. FE<sub>fine2</sub></b>         | 3.73%   | 11.22%    | 5.89%        | 6.10%         | 7.97%         | 6.99%          |
| <b>FE<sub>fine1</sub> vs. FE<sub>fine2</sub></b>       | 1.35%   | 4.02%     | 1.93%        | 2.49%         | 2.48%         | 2.16%          |
| <b>PMMA: FE<sub>org</sub> vs. FE<sub>con</sub></b>     | 0.39%   | 1.55%     | 0.41%        | 0.97%         | 0.27%         | 0.18%          |
| <b>PMMA: FE<sub>con</sub> vs. FE<sub>fine2</sub></b>   | 10.43%  | 9.60%     | 12.44%       | 11.87%        | 2.87%         | 2.93%          |
| <b>PMMA: FE<sub>fine1</sub> vs. FE<sub>fine2</sub></b> | 2.91%   | 2.52%     | 3.23%        | 3.06%         | 0.91%         | 0.91%          |
